# Supplementary material for: Facile assembly of a hierarchical core@shell Fe3O4@CuMgAl-LDH (layered double hydroxide) magnetic nanocatalyst for the hydroxylation of phenol
Source: Royal Society of Chemistry journal article supplement (doi:10.1039/c3ta10349h), 2013-01-01
Supplement: c3ta10349h.pdf [file c3ta10349h.pdf]

**Supporting Information Available:**

**Facile assembly of hierarchical core@shell  $\text{Fe}_3\text{O}_4$ @CuMgAl-LDH  
(layered double hydroxide) magnetic nanocatalyst for the  
hydroxylation of phenol**

Hui Zhang,\* Guoyan Zhang, Xue Bi and Xitao Chen

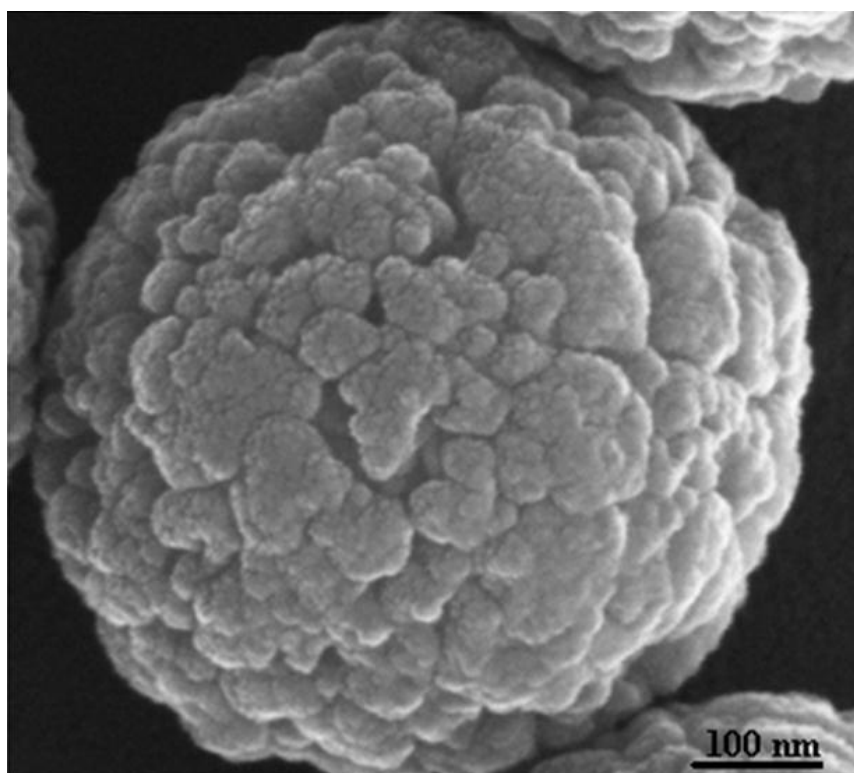

**Figure S1** Magnified SEM image of the  $\text{Fe}_3\text{O}_4$  spherical particles.

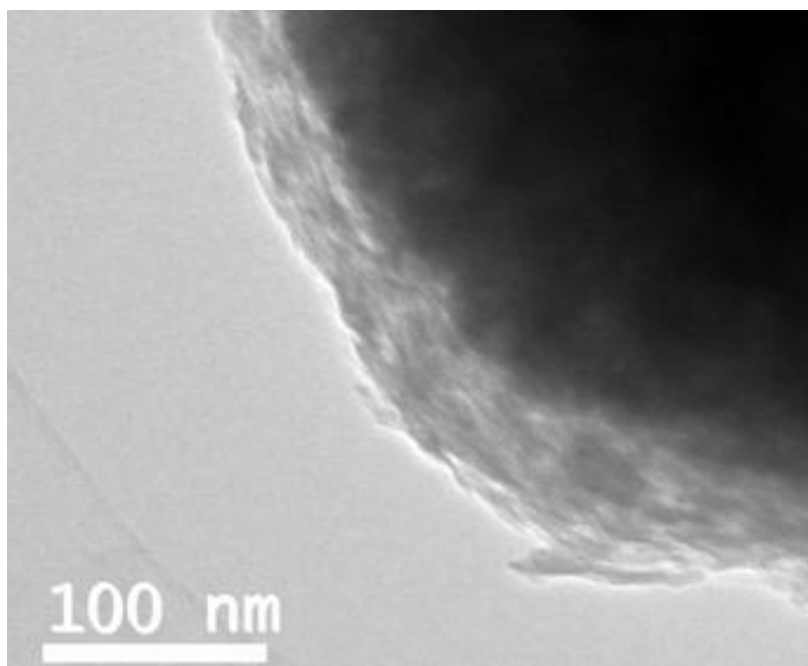

Figure S2 Enlarged TEM image of left below inset in Fig. 2d for  $\text{Fe}_3\text{O}_4@\text{CuMgAl-1}$ .

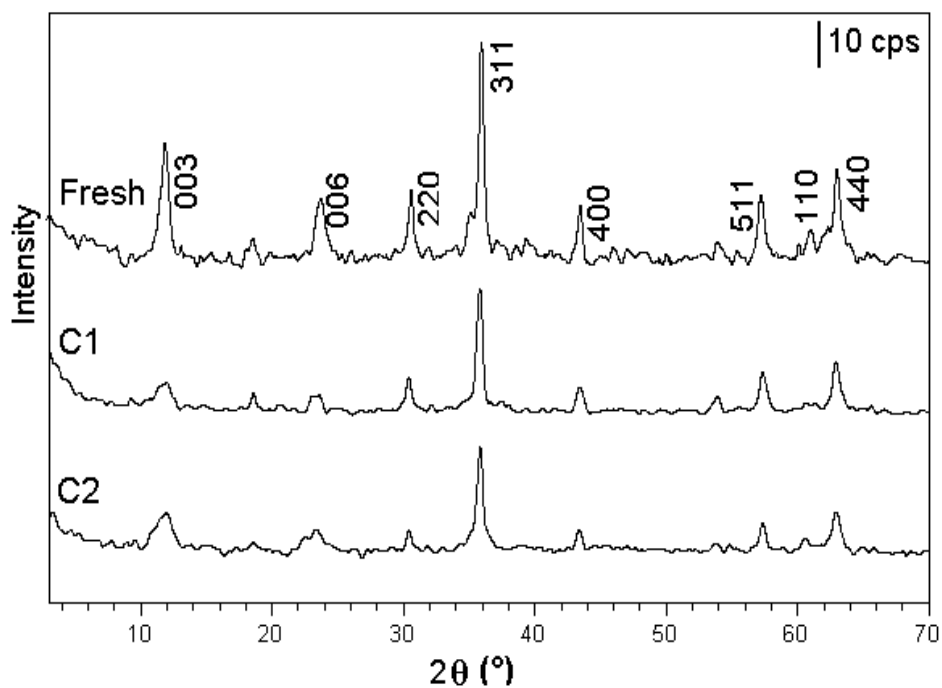

Figure S3 XRD patterns of the fresh and reclaimed catalysts  $\text{Fe}_3\text{O}_4@\text{CuMgAl-1c1}$  and  $\text{Fe}_3\text{O}_4@\text{CuMgAl-1c2}$ .

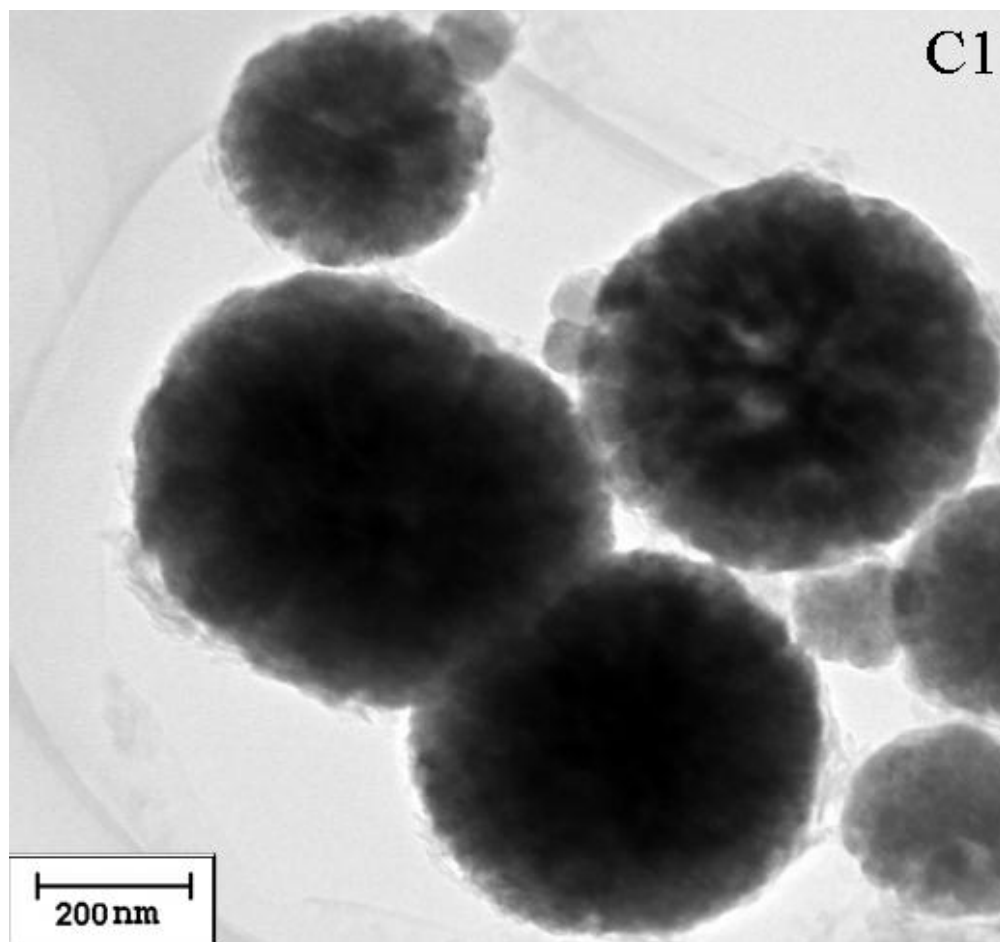

Figure S4 TEM image of the reclaimed catalyst  $\text{Fe}_3\text{O}_4@ \text{CuMgAl-1c1}$ .
